# Supplementary material for: Optical and photocatalytic behaviours of nanoparticles in the Ti–Zn–O binary system
Source: Royal Society of Chemistry journal article supplement (doi:10.1039/c3ra48030e), 2014-06-24
Supplement: c3ra48030e1.pdf [file c3ra48030e1.pdf]

## Supporting Information

### Optical and Photocatalytic Behaviours of Nanoparticles in the Ti-Zn-O Binary System

Josephine B. M. Goodall,<sup>a</sup> Suela Kellici,<sup>b</sup> Derek Illsley,<sup>c</sup> Robert Lines,<sup>c</sup> Jonathan C Knowles<sup>d,e</sup> and Jawwad A. Darr<sup>\*a</sup>

Powder XRD spectra were taken on an X-pert Pro PW3064/60 diffractometer with a high-throughput stage and Cu-K $\alpha$  radiation ( $\lambda = 0.15418$  nm). Continuous scans were collected over the  $2\theta$  range 20 - 80 ° with a step size of 0.02 ° for a dwell time of 2 s per step.

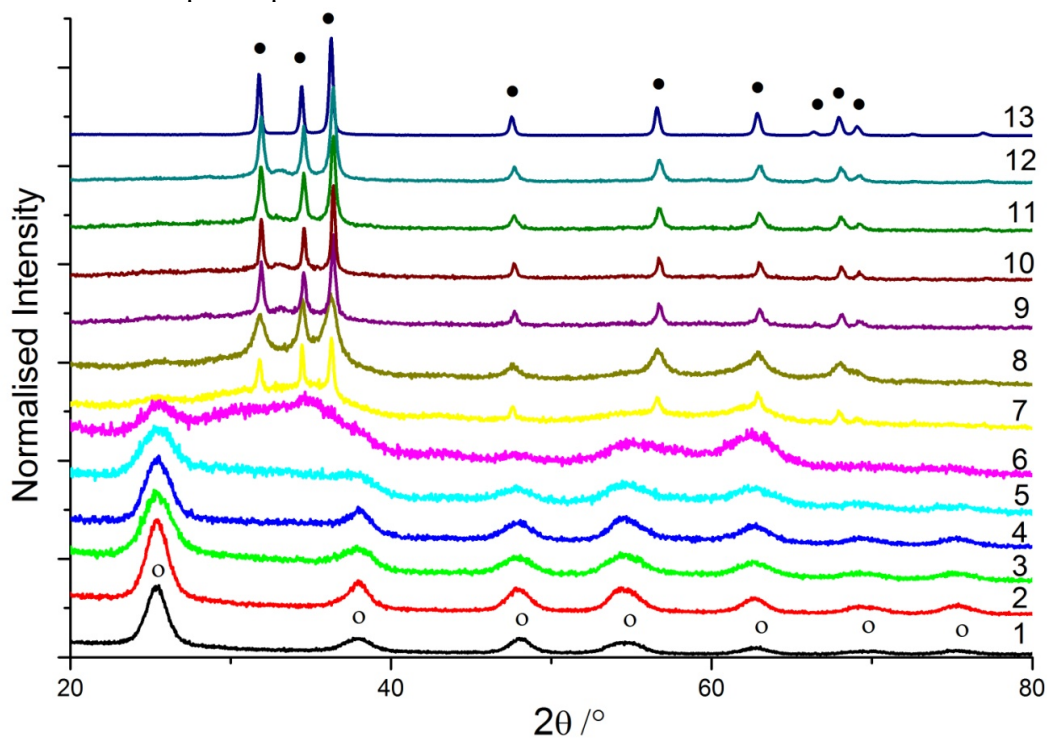

**Figure S1:** XRD spectra of TiO<sub>2</sub>:ZnO nano-coprecipitates (○- anatase peaks, ●- ZnO peaks).

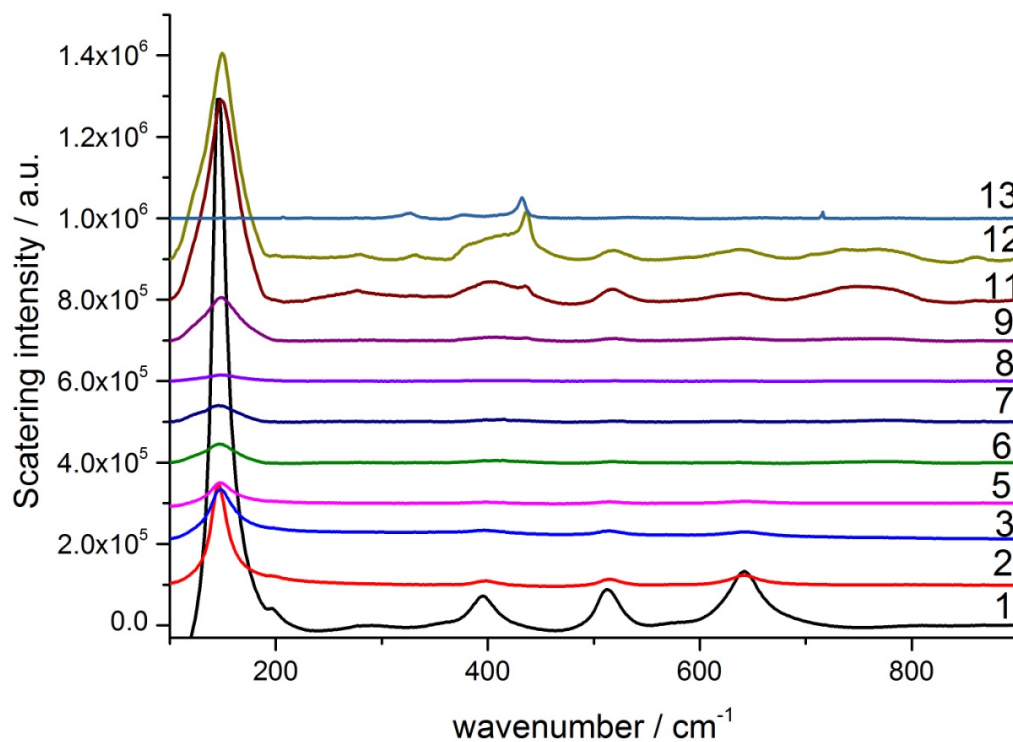

**Figure S2:** Raman spectra of selected TiO<sub>2</sub>:ZnO coprecipitates

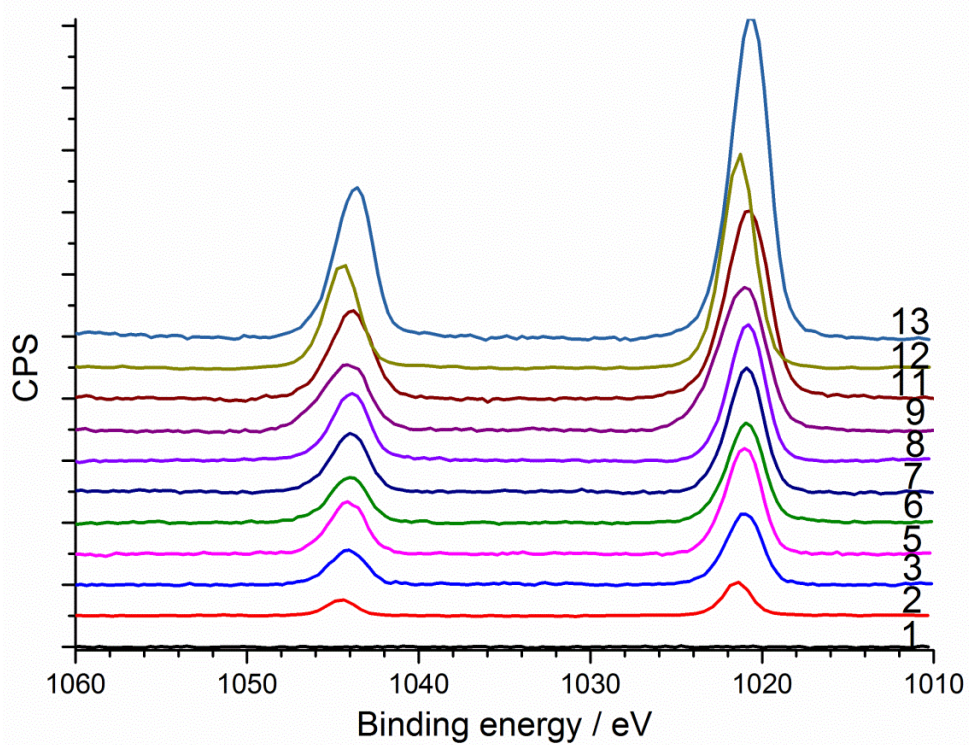

**Figure S3:** XPS spectra of the Zn 2p region for selected TiO<sub>2</sub>:ZnO coprecipitates

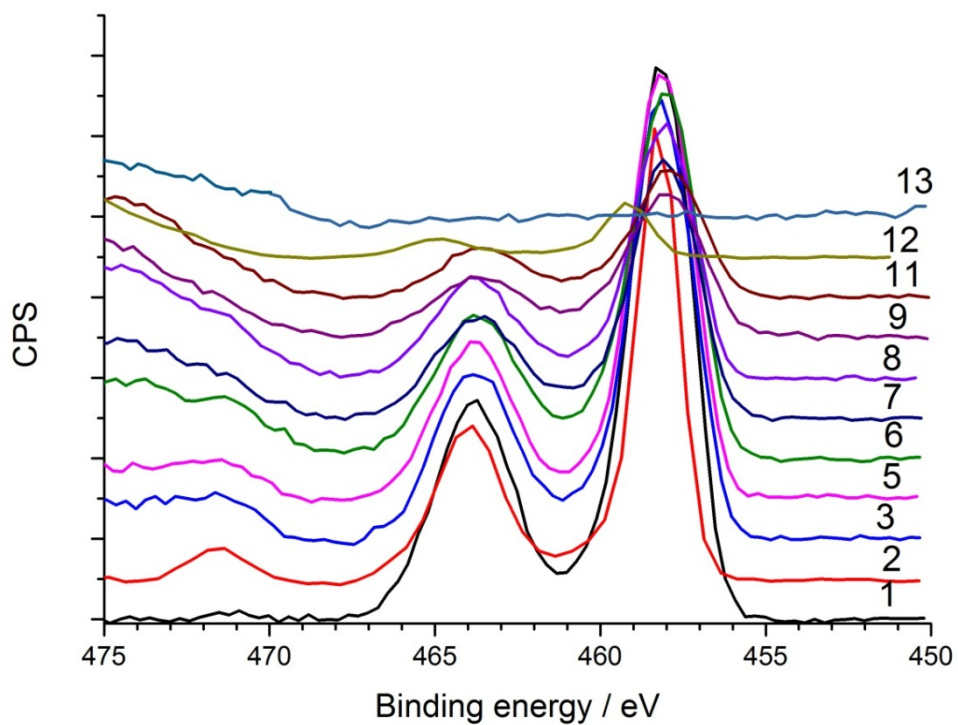

**Figure S4:** XPS spectra of the Ti 2p region for selected  $\text{TiO}_2\text{:ZnO}$  coprecipitates

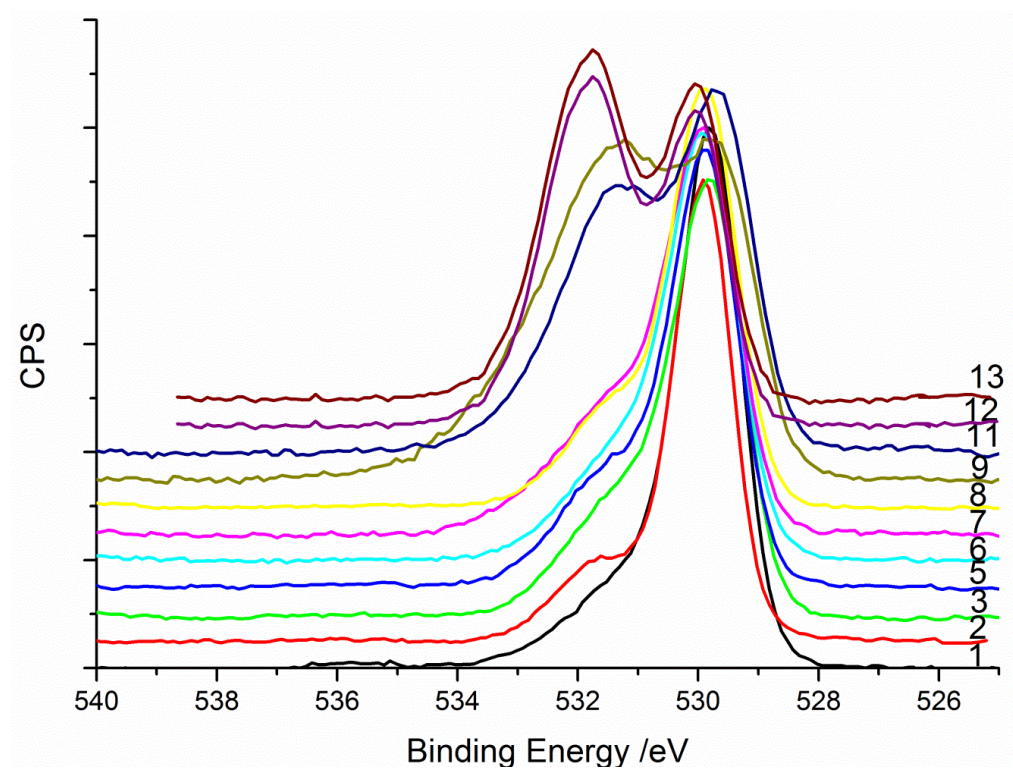

**Figure S5:** XPS spectra of the O1s region for selected  $\text{TiO}_2\text{:ZnO}$  coprecipitates

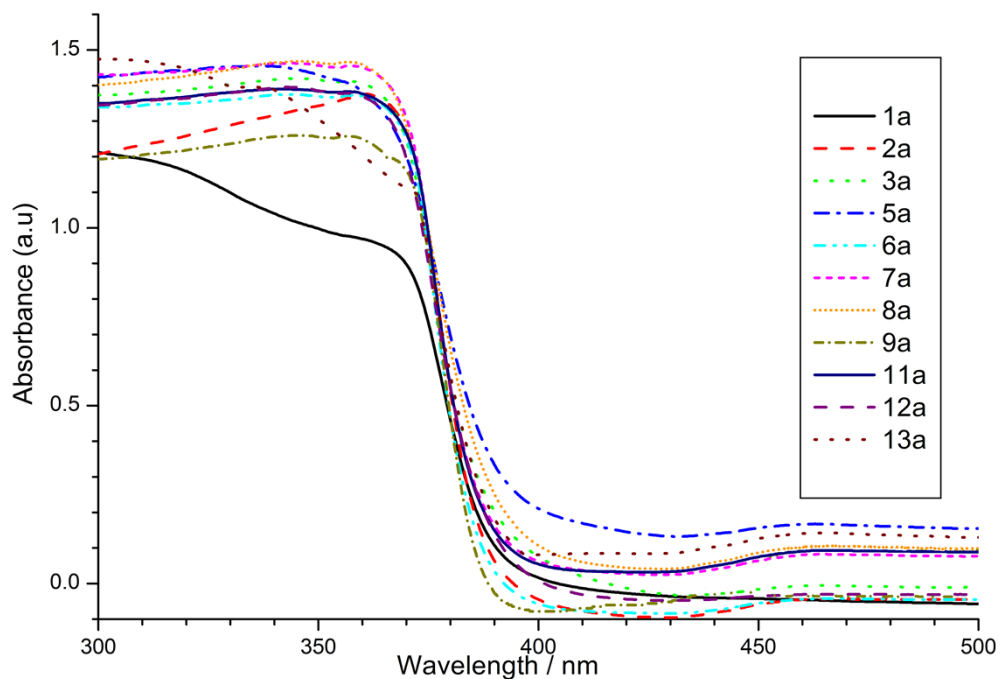

**Figure S6:** The UV-Vis absorption spectra of the samples after heat treatment to 850 °C for 5 hrs.

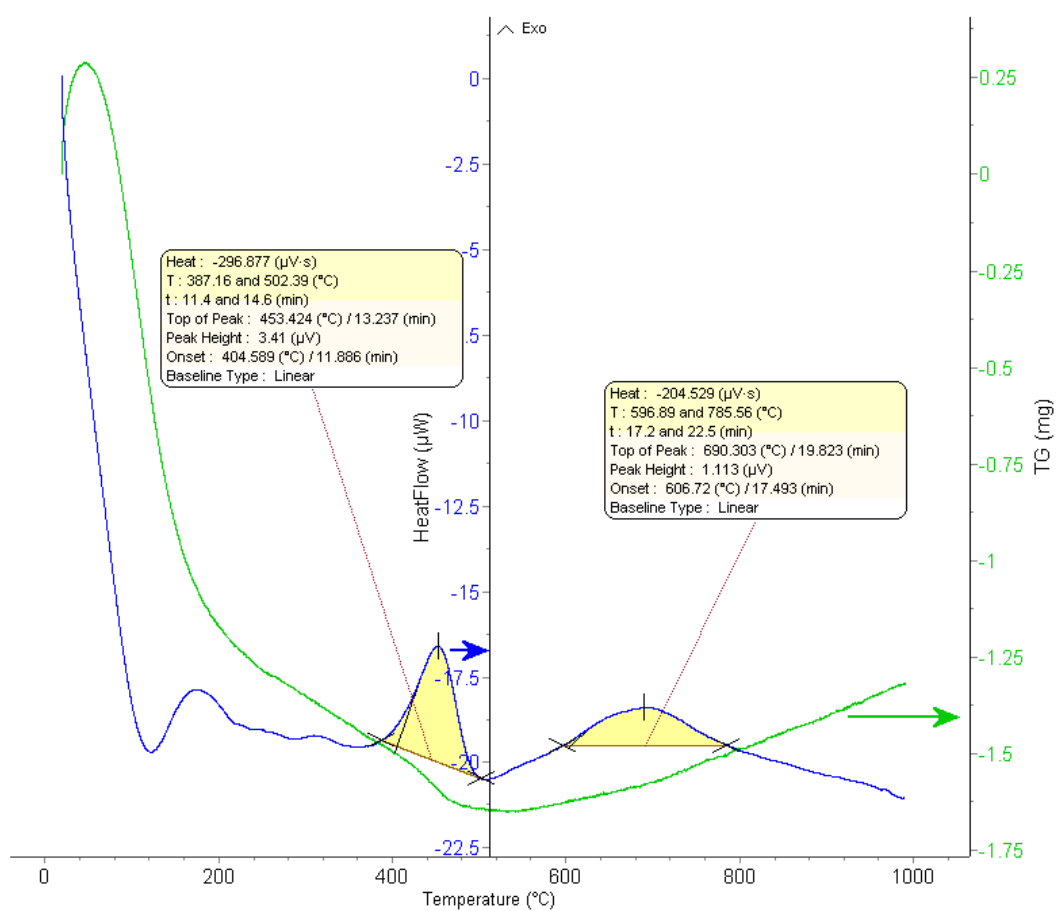

**Figure S7:** STA of sample 8 (60:40 Ti:Zn) heated at 10 °C.min<sup>-1</sup> in air.



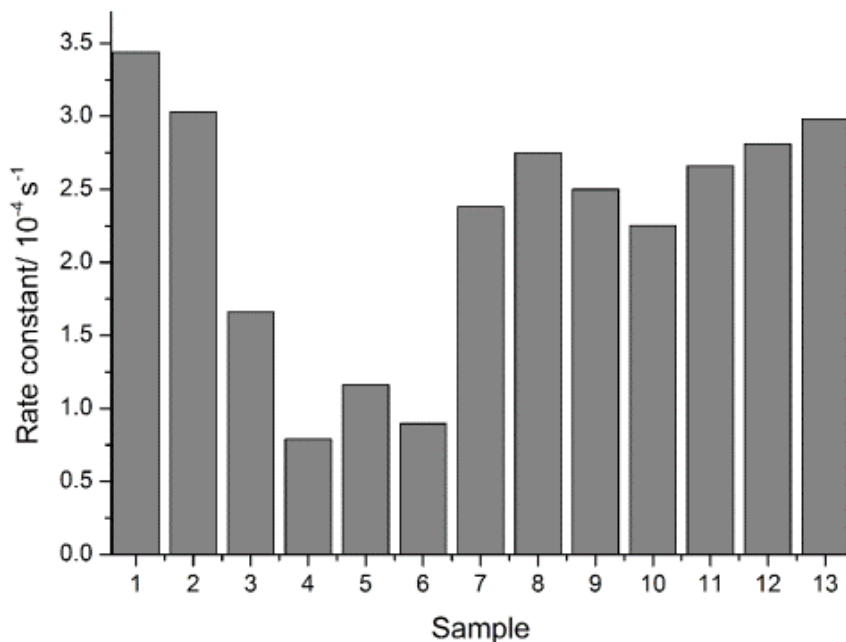

**Figure S8:** First order rate constant of nanoparticles (samples 1-13) for the decolourisation of MB (rate constant of as-prepared samples).

To calculate the bandgap, The Kubelka-Munk (K-M) function and Tauc plots were used. The K-M function,  $F(R)$  used is shown in equation 1 ( $R$  is the reflectance) and the factors for indirect ( $F(R).E^{1/2}$ ) and direct ( $F(R).E^2$ ) band gaps used for the Tauc plots were plotted against photon energy. The K-M function defined below for direct and indirect energy transitions was plotted against the photon energy and  $E_g$  was determined as the energy coordinate of the point on the low energy side of  $F(R)$  curve at which the linear increase starts.

$$F_{KM} = \frac{(1 - R^2)}{2R} \quad \text{Equation (1)}$$

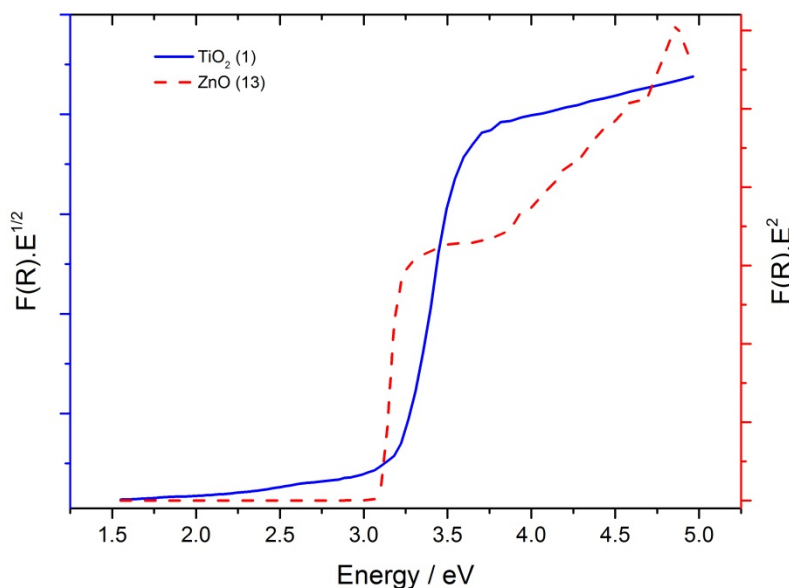

**Figure S9:** Determination of bandgap values for pure  $\text{TiO}_2$  and  $\text{ZnO}$  samples calculated using Kubelka –Munk function

**Table S1:** Bandgap values for zinc titanate samples

| Sample | Bandgap /eV |          |
|--------|-------------|----------|
|        | Direct      | Indirect |
| 1a     | 3.25        | 3.18     |
| 2a     | 3.24        | 3.23     |
| 3a     | 3.23        | 3.22     |
| 5a     | 3.20        | 3.19     |
| 6a     | 3.25        | 3.24     |
| 7a     | 3.23        | 3.23     |
| 8a     | 3.32        | 3.32     |
| 9a     | 3.24        | 3.23     |
| 11a    | 3.23        | 3.22     |
| 12a    | 3.24        | 3.22     |
| 13a    | 3.32        | 3.31     |

Adsorption coefficients  $Q$  were calculated using the following formula<sup>1</sup>

$$Q = \frac{V\Delta C}{m} \quad \text{Equation (S1)}$$

Where:

$\Delta C$  = the difference between the initial concentration ( $C_0$ ) and the equilibrium concentration ( $C$ ),

$V$  = the volume methylene blue solution used (0.05 L)

$m$  = the mass of catalyst (0.1 g).

**Table S2:** Adsorption coefficient<sup>1</sup> values for Zn-Ti-O samples

| Sample | Adsorption Coefficient |
|--------|------------------------|
| 100/0  | 1.10                   |
| 90/10  | 0.19                   |
| 80/20  | 0.00                   |
| 70/30  | 0.15                   |
| 75/25  | 0.24                   |
| 60/40  | 0.21                   |
| 50/50  | 0.06                   |
| 40/60  | 0.03                   |
| 30/70  | 0.02                   |

**Table S3:** Adsorption coefficient values for zinc titanate samples (heat- treated)

| <b>Sample</b> | <b>Adsorption Coefficient</b> |
|---------------|-------------------------------|
| 25/75a        | 0.10                          |
| 20/80a        | 0.03                          |
| 10/90a        | 0.05                          |
| 0/100         | 0.20                          |
| 20/80         | 0.06                          |
| 25/75         | 0.10                          |
| 30/70         | 0.02                          |
| Optisol       | 0.14                          |
| P25           | 0.09                          |

References:

1. S Khezrianjoo, H. D. Revanasiddappa, *Chem. Sci. J.*, Vol. 2012: CSJ-85.
